# Supplementary material for: Biological Amnion Prevents Flexor Tendon Adhesion in Zone II: A Controlled, Multicentre Clinical Trial
Source: Hindawi journal article supplement (doi:10.1155/2019/2354325), 2019-04-02
Supplement: f1 [file 2354325.f1.zip]

## Summary of relevant initial data

| Number | Gender | Age | Cause of injury      | Finger        | Follow up (month) | Both sides | PIP(Proximal interphalangeal joint)° | DIP(Distal interphalangeal joint)° | TAM(Total active movement)°     | Hospital         | Group  | Deep and superficial tendons | Complications                |
|--------|--------|-----|----------------------|---------------|-------------------|------------|--------------------------------------|------------------------------------|---------------------------------|------------------|--------|------------------------------|------------------------------|
| 1      | Male   | 32  | Sharp injury         | Index         | 3                 | Right      | 88                                   | 69                                 | 157                             | Third Hospital   | PDLLA  | Yes                          |                              |
| 2      | Male   | 25  | Electric saw injury  | Middle、 Ring  | 6                 | Right      | Middle 80 Ring 75                    | Middle70 Ring 75                   | Middle150 Ring 145              | Third Hospital   | PDLLA  | Yes                          |                              |
| 3      | Female | 39  | Machine crush injury | 2-5fingers    | 12                | Right      | Index70Middle73Ring78Little68        | Index50Middle56Ring53Little52      | Index120Middle129Ring131Little1 | Third Hospital   | PDLLA  | Yes , Little: No             | Itch                         |
| 4      | Female | 60  | Sharp injury         | Middle        | 3                 | Right      | 85                                   | 60                                 | 145                             | Third Hospital   | PDLLA  | Yes                          |                              |
| 5      | Male   | 43  | Electric saw injury  | Middle、 Ring  | 4.5               | Right      | Middle 81 Ring 82                    | Middle 69 Ring 73                  | Middle 150 Ring 155             | Third Hospital   | PDLLA  | No                           |                              |
| 6      | Female | 31  | Sharp injury         | Little        | 3                 | Right      | 90                                   | 79                                 | 169                             | Third Hospital   | PDLLA  | No                           |                              |
| 7      | Male   | 35  | Sharp injury         | Index、 Middle | 5                 | Left       | Index87Middle90                      | Index75Middle76                    | Index162Middle166               | Third Hospital   | PDLLA  | No                           |                              |
| 8      | Male   | 26  | Electric saw injury  | 2-4fingers    | 6                 | Left       | Index80Middle83Ring 75               | Index68Middle71Ring 65             | Index148Middle154Ring 140       | Third Hospital   | PDLLA  | Yes                          | Middle: redness and swelling |
| 9      | Female | 38  | Electric saw injury  | IndexMiddle   | 6                 | Left       | Index82Middle87                      | Index79Middle76                    | Index161Middle163               | Third Hospital   | PDLLA  | Yes                          |                              |
| 10     | Female | 31  | Sharp injury         | Ring          | 3                 | Left       | 85                                   | 71                                 | 156                             | Third Hospital   | PDLLA  | Yes                          |                              |
| 11     | Male   | 48  | Machine crush injury | Index-Middle  | 6                 | Right      | Index72Middle74                      | Index65Middle68                    | Index137Middle142               | Third Hospital   | PDLLA  | Yes                          |                              |
| 12     | Female | 48  | Machine crush injury | 3-5fingers    | 12                | Left       | Index62Middle69Ring 58               | Index57Middle50Ring 55             | Index119Middle119Ring 113       | Third Hospital   | PDLLA  | Yes                          |                              |
| 13     | Male   | 52  | Electric saw injury  | Middle        | 3                 | Right      | 88                                   | 76                                 | 164                             | Third Hospital   | PDLLA  | Yes                          |                              |
| 14     | Male   | 56  | Sharp injury         | Index         | 3                 | Right      | 85                                   | 71                                 | 156                             | Third Hospital   | PDLLA  | No                           |                              |
| 15     | Male   | 49  | Sharp injury         | Middle、 Ring  | 6                 | Right      | Middle75Ring 70                      | Middle70Ring 65                    | Middle145Ring 135               | Third Hospital   | PDLLA  | No                           |                              |
| 16     | Male   | 43  | Electric saw injury  | IndexMiddle   | 6                 | Left       | Index80Middle70                      | Index65Middle60                    | Index145Middle130               | Third Hospital   | PDLLA  | No                           |                              |
| 17     | Female | 41  | Sharp injury         | Little        | 3                 | Left       | 83                                   | 70                                 | 153                             | Third Hospital   | PDLLA  | Yes                          |                              |
| 18     | Female | 39  | Sharp injury         | Ring          | 3                 | Left       | Ring 80                              | Ring 65                            | Ring 145                        | Third Hospital   | PDLLA  | Yes                          |                              |
| 19     | Male   | 43  | Electric saw injury  | IndexRing     | 3                 | Left       | Index80Ring 70                       | Index65Ring 60                     | Index145Ring 130                | Workers Hospital | PDLLA  | Yes                          | Indexredness and swelling    |
| 20     | Male   | 36  | Machine crush injury | 2-4fingers    | 12                | Right      | Index70Middle65Ring 68               | Index45Middle40Ring 43             | Index115Middle105Ring 111       | Workers Hospital | PDLLA  | Yes                          | Ring: exudate                |
| 21     | Male   | 55  | Electric saw injury  | 2-5fingers    | 12                | Right      | Index45Middle40Ring 50Little55       | Index37Middle35Ring 40Little40     | Index82Middle75Ring 90Little95  | Workers Hospital | PDLLA  | Yes                          | Middle: exudate              |
| 22     | Female | 21  | Sharp injury         | Little        | 3                 | Right      | 86                                   | 75                                 | 161                             | Workers Hospital | PDLLA  | Yes                          |                              |
| 23     | Female | 29  | Sharp injury         | MiddleRing    | 5                 | Right      | Middle78Ring 75                      | Middle70Ring 70                    | Middle148Ring 145               | Workers Hospital | PDLLA  | No                           |                              |
| 24     | Female | 33  | Machine crush injury | Middle        | 3                 | Right      |                                      |                                    |                                 | Workers Hospital | PDLLA  | Yes                          | Rupture of tendon            |
| 25     | Male   | 46  | Machine crush injury | IndexMiddle   | 5                 | Right      | Index62Middle70                      | Index60Middle52                    | Index122Middle122               | Workers Hospital | PDLLA  | Yes                          |                              |
| 26     | Male   | 39  | Sharp injury         | Ring          | 3                 | Right      | 73                                   | 70                                 | 133                             | Workers Hospital | PDLLA  | Yes                          |                              |
| 27     | Male   | 47  | Sharp injury         | MiddleRing    | 3                 | Right      | Middle83Ring 85                      | Middle70Ring 72                    | Middle153Ring 157               | Second hospital  | PDLLA  | Yes                          |                              |
| 28     | Female | 35  | Electric saw injury  | 2-4fingers    | 12                | Right      | Index48Middle45Ring 30               | Index50Middle53Ring 45             | Index98Middle98Ring75           | Second hospital  | PDLLA  | Yes                          | Indexredness and swelling    |
| 29     | Female | 46  | Machine crush injury | Ring          | 6                 | Right      | Ring 56                              | Ring 50                            | Ring 116                        | Second hospital  | PDLLA  | Yes                          |                              |
| 30     | Female | 58  | Sharp injury         | Index         | 3                 | Right      | 76                                   | 70                                 | 146                             | Second hospital  | PDLLA  | No                           |                              |
| 31     | Male   | 47  | Sharp injury         | Middle        | 3                 | Right      | 85                                   | 70                                 | 155                             | Second hospital  | PDLLA  | No                           |                              |
| 32     | Male   | 40  | Sharp injury         | MiddleRing    | 6                 | Right      | Middle75Ring 70                      | Middle73Ring69                     | Middle148 Ring 139              | Second hospital  | PDLLA  | Yes                          |                              |
| 33     | Female | 32  | Machine crush injury | MiddleRing    | 6                 | Left       | Middle80Ring 78                      | Middle65Ring 63                    | Middle145Ring 141               | Second hospital  | PDLLA  | Yes                          |                              |
| 34     | Male   | 48  | Electric saw injury  | IndexMiddle   | 6                 | Right      | Index89Middle80                      | Index80Middle77                    | Index169Middle157               | Second hospital  | PDLLA  | Yes                          |                              |
| 35     | Male   | 43  | Machine crush injury | Ring          | 6                 | Right      | Ring 80                              | Ring 71                            | Ring 151                        | Second hospital  | PDLLA  | Yes                          |                              |
|        |        |     |                      |               |                   |            |                                      |                                    |                                 |                  |        |                              |                              |
| 1      | Male   | 29  | Electric saw injury  | Middle、 Ring  | 6                 | Left       | Middle 80 Ring 75                    | Middle60 Ring 55                   | Middle140 Ring 130              | Third Hospital   | amnion | Yes                          |                              |
| 2      | Female | 39  | Machine crush injury | 2-4fingers    | 12                | Left       | Index50Middle63Ring48                | Index50Middle65Ring53              | Index100Middle109Ring101        | Third Hospital   | amnion | Yes                          | Index: redness and swelling  |
| 3      | Male   | 65  | Sharp injury         | Middle        | 3                 | Left       | 85                                   | 70                                 | 155                             | Third Hospital   | amnion | Yes                          |                              |
| 4      | Male   | 43  | Electric saw injury  | Index、 Ring   | 6                 | Right      | Index 82 Ring 86                     | Index 67 Ring 73                   | Middle 149 Ring 159             | Third Hospital   | amnion | Yes                          |                              |
| 5      | Male   | 51  | Sharp injury         | Index         | 3                 | Right      | 89                                   | 80                                 | 169                             | Third Hospital   | amnion | Yes                          |                              |
| 6      | Male   | 35  | Sharp injury         | Index、 Middle | 5                 | Right      | Index87Middle83                      | Index75Middle71                    | Index162Middle154               | Third Hospital   | amnion | Yes                          |                              |
| 7      | Male   | 58  | Electric saw injury  | 2-4fingers    | 6                 | Right      | Index80Middle83Ring 75               | Index68Middle71Ring 65             | Index148Middle154Ring 140       | Third Hospital   | amnion | Yes                          |                              |
| 8      | Female | 28  | Electric saw injury  | Index         | 6                 | Right      | Index82                              | Index70                            | Index152                        | Third Hospital   | amnion | Yes                          |                              |
| 9      | Male   | 51  | Sharp injury         | IndexRing     | 3                 | Right      | Index80Ring 79                       | Index73Ring 70                     | Index153Ring 149                | Third Hospital   | amnion | No                           |                              |
| 10     | Male   | 38  | Machine crush injury | 2-4fingers    | 6                 | Right      | Index71Middle60Ring 55               | Index54Middle46Ring 40             | Index125Middle106Ring 95        | Third Hospital   | amnion | Yes                          |                              |
| 11     | Female | 38  | Machine crush injury | 3-5fingers    | 12                | Left       | Index52Middle72Ring 48               | Index47Middle53Ring 53             | Index99Middle125Ring 101        | Third Hospital   | amnion | Yes                          |                              |
| 12     | Male   | 63  | Electric saw injury  | Middle、 Ring  | 6                 | Right      | Middle75Ring 85                      | Middle77Ring 70                    | Middle152Ring 155               | Third Hospital   | amnion | No                           |                              |
| 13     | Male   | 26  | Sharp injury         | Index         | 3                 | Left       | 85                                   | 75                                 | 160                             | Third Hospital   | amnion | No                           |                              |
| 14     | Male   | 59  | Machine crush injury | 3-5fingers    | 12                | Left       | Middle75Ring 70Little71              | Middle65Ring 63Little61            | Middle140Ring 133Little132      | Third Hospital   | amnion | Yes                          |                              |
| 15     | Female | 43  | Electric saw injury  | IndexMiddle   | 6                 | Left       | Index80Middle83                      | Index75Middle71                    | Index155Middle154               | Third Hospital   | amnion | No                           |                              |
| 16     | Male   | 58  | Sharp injury         | Index         | 3                 | Right      | 86                                   | 80                                 | 166                             | Third Hospital   | amnion | No                           |                              |
| 17     | Male   | 39  | Sharp injury         | Ring          | 3                 | Right      | Ring 86                              | Ring 65                            | Ring 151                        | Third Hospital   | amnion | No                           |                              |
| 18     | Male   | 43  | Electric saw injury  | IndexRing     | 3                 | Left       | Index86Ring 82                       | Index63Ring 61                     | Index149Ring 143                | Workers Hospital | amnion | Yes                          |                              |
| 19     | Male   | 36  | Machine crush injury | 2-4fingers    | 12                | Left       | Index50Middle55Ring 48               | Index45Middle40Ring 41             | Index95Middle95Ring 89          | Workers Hospital | amnion | Yes                          |                              |
| 20     | Female | 46  | Electric saw injury  | IndexMiddle   | 3                 | Right      | Index77Middle82                      | Index80Middle81                    | Index157Middle163               | Workers Hospital | amnion | No                           |                              |
| 21     | Female | 48  | Electric saw injury  | MiddleRing    | 6                 | Left       | Middle83Ring 79                      | Middle69Ring 73                    | Middle152Ring 152               | Workers Hospital | amnion | Yes                          |                              |
| 22     | Female | 31  | Sharp injury         | Little        | 3                 | Right      | 87                                   | 79                                 | 166                             | Workers Hospital | amnion | Yes                          |                              |
| 23     | Male   | 48  | Sharp injury         | Ring          | 3                 | Left       | Ring 86                              | Ring 75                            | Ring 161                        | Workers Hospital | amnion | Yes                          |                              |
| 24     | Male   | 55  | Sharp injury         | Middle        | 3                 | Right      | 87                                   | 76                                 | 163                             | Workers Hospital | amnion | Yes                          |                              |
| 25     | Male   | 35  | Machine crush injury | 2-5fingers    | 12                | Right      | Index73Middle61Ring66Little40        | Index52Middle64Ring59Little47      | Index125Middle125Ring125Little4 | Workers Hospital | amnion | Yes                          |                              |

|    |        |    |                      |             |    |       |                        |                        |                           |                 |        |     |
|----|--------|----|----------------------|-------------|----|-------|------------------------|------------------------|---------------------------|-----------------|--------|-----|
| 26 | Male   | 45 | Machine crush injury | 2-4fingers  | 12 | Right | Index75Middle79Ring 83 | Index79Middle75Ring 73 | Index154Middle154Ring 156 | Second hospital | amnion | Yes |
| 27 | Female | 23 | Sharp injury         | Middle      | 3  | Right | 87                     | 80                     | 167                       | Second hospital | amnion | Yes |
| 28 | Male   | 35 | Electric saw injury  | IndexMiddle | 6  | Right | Index81Middle83        | Index80Middle81        | Index161Middle164         | Second hospital | amnion | Yes |
| 29 | Female | 37 | Sharp injury         | Ring        | 3  | Right | 85                     | 80                     | 165                       | Second hospital | amnion | Yes |
| 30 | Male   | 49 | Electric saw injury  | IndexMiddle | 6  | Right | Index72Middle75        | Index69Middle72        | Index141Middle147         | Second hospital | amnion | Yes |
| 31 | Male   | 37 | Sharp injury         | Middle      | 3  | Left  | Middle83               | Middle73               | Middle156                 | Second hospital | amnion | No  |
| 32 | Male   | 49 | Electric saw injury  | Middle      | 6  | Left  | 75                     | 50                     | 125                       | Second hospital | amnion | Yes |
| 33 | Female | 47 | Sharp injury         | Ring        | 3  | Left  | 87                     | 78                     | 165                       | Second hospital | amnion | No  |

|    |        |    |                      |              |    |       |                         |                         |                           |                  |         |     |                                                  |
|----|--------|----|----------------------|--------------|----|-------|-------------------------|-------------------------|---------------------------|------------------|---------|-----|--------------------------------------------------|
| 1  | Male   | 23 | Electric saw injury  | 2-4fingers   | 12 | Right | Index50Middle47 Ring 40 | Index35Middle30 Ring 35 | Index85Middle77 Ring 75   | Third Hospital   | control | Yes | Index: redness and swelling<br>Rupture of tendon |
| 2  | Female | 39 | Machine crush injury | IndexMiddle  | 12 | Right | Index50Middle53         | Index41Middle56         | Index91Middle109          | Third Hospital   | control | Yes |                                                  |
| 3  | Male   | 65 | Sharp injury         | Middle       | 3  | Right |                         |                         |                           | Third Hospital   | control | Yes |                                                  |
| 4  | Male   | 43 | Electric saw injury  | Index、Ring   | 6  | Right | Index 62 Ring 56        | Index 59 Ring 63        | Middle 121Ring 119        | Third Hospital   | control | Yes |                                                  |
| 5  | Male   | 61 | Sharp injury         | Little       | 3  | Left  | 85                      | 80                      | 165                       | Third Hospital   | control | Yes | Index: exudate                                   |
| 6  | Male   | 35 | Sharp injury         | Index、Middle | 5  | Left  | Index70Middle50         | Index60Middle39         | Index130Middle89          | Third Hospital   | control | Yes |                                                  |
| 7  | Male   | 45 | Electric saw injury  | 2-4fingers   | 6  | Left  | Index70Middle63Ring 71  | Index65Middle60Ring 60  | Index135Middle123Ring 131 | Third Hospital   | control | Yes |                                                  |
| 8  | Female | 22 | Sharp injury         | Index        | 6  | Left  | Index82                 | Index70                 | Index152                  | Third Hospital   | control | No  |                                                  |
| 9  | Female | 51 | Sharp injury         | IndexRing    | 3  | Right | Index53Ring 45          | Index41Ring 47          | Index94Ring 92            | Third Hospital   | control | No  | Ring : edema                                     |
| 10 | Female | 55 | Machine crush injury | 2-4fingers   | 6  | Left  | Index67Middle75Ring 65  | Index54Middle46Ring 40  | Index121Middle121Ring 105 | Third Hospital   | control | No  |                                                  |
| 11 | Female | 29 | Sharp injury         | Little       | 3  | Right | 80                      | 71                      | 151                       | Workers Hospital | control | No  |                                                  |
| 12 | Female | 49 | Electric saw injury  | Ring Little  | 6  | Left  | Ring 80Little86         | Ring70Little70          | Ring150Little156          | Workers Hospital | control | Yes |                                                  |
| 13 | Male   | 53 | Machine crush injury | MiddleRing   | 12 | Right | Middle71Ring 66         | Middle50Ring 52         | Middle121Ring 118         | Workers Hospital | control | No  | Ring exudate                                     |
| 14 | Female | 49 | Sharp injury         | Index        | 3  | Right | 83                      | 70                      | 153                       | Workers Hospital | control | Yes |                                                  |
| 15 | Male   | 50 | Sharp injury         | Middle       | 3  | Left  | 87                      | 80                      | 167                       | Workers Hospital | control | Yes |                                                  |
| 16 | Male   | 43 | Electric saw injury  | IndexMiddle  | 6  | Left  | Index73Middle71         | Index65Middle61         | Index138Middle132         | Second hospital  | control | Yes |                                                  |
| 17 | Female | 32 | Electric saw injury  | Middle       | 3  | Right | 83                      | 71                      | 154                       | Second hospital  | control | Yes | Middle: redness and swelling                     |
| 18 | Male   | 39 | Machine crush injury | MiddleRing   | 6  | Right | Middle70Ring 72         | Middle63Ring 61         | Middle133Ring 133         | Second hospital  | control | No  |                                                  |
| 19 | Male   | 41 | Sharp injury         | Little       | 3  | Right | 83                      | 70                      | 153                       | Second hospital  | control | Yes |                                                  |
| 20 | Male   | 37 | Electric saw injury  | MiddleRing   | 6  | Right | Middle58Ring 53         | Middle40Ring 41         | Middle98Ring 94           | Second hospital  | control | Yes |                                                  |
| 21 | Female | 26 | Sharp injury         | IndexMiddle  | 6  | Left  | Index61Middle57         | Index50Middle45         | Index111Middle102         | Second hospital  | control | Yes |                                                  |

A total of 89 patients with flexor tendon injury in zone II were recruited from the Third Affiliated Hospital of Hebei Medical University, Tangshan Workers' Hospital and Tangshan Second Hospital from June 2015 to June 2018. The patients were divided into a control group, a poly-DL-lactic acid (PDLLA) group and an amnion group according to the different tendon treatments applied. The patients included 50 males and 39 females with a total of 160 injured fingers and ages ranging from 21 years to 65 years (average age, 42.1 years). The causes of injuries included sharp cut wounds in 40 cases, electric saw injuries in 29 cases and machine crush injuries in 20 cases. Injuries involved the Index finger (44 fingers), Middle finger (57 fingers), Ring finger (45 fingers) or Little finger (14 fingers). The time from injury to operation was 1–6 h. The patients were followed at 1, 2, 3, 6 and 12 months after surgery by senior surgeons of the hand department. The ranges of active flexion as well as the extension lag in the proximal and distal interphalangeal joints using the method described by Strickland and Glogovac(1980) with a digital goniometer were evaluated.
